# Supplementary material for: Characteristics of long working hours and subsequent psychological and physical responses: JNIOSH cohort study
Source: PubMed Central journal article supplement — Occup Environ Med. 2023 Apr 27;80(6):304–11. doi: 10.1136/oemed-2022-108672 (PMC10313994; doi:10.1136/oemed-2022-108672), 2023-04-27
Supplement: oemed-2022-108672supp001.pdf [file oemed-2022-108672supp001.pdf]

Supplemental Table 1 Distribution of attributes by average working hours

|            |                                       | Working hours categories (average of 6 months) |        |              |        |              |        |              |        |           |        |            |        |
|------------|---------------------------------------|------------------------------------------------|--------|--------------|--------|--------------|--------|--------------|--------|-----------|--------|------------|--------|
|            |                                       | <140 h/mo                                      |        | 140–180 h/mo |        | 180–205 h/mo |        | 205–220 h/mo |        | ≥220 h/mo |        | Total      |        |
|            |                                       | (n=2,454)                                      |        | (n=9,793)    |        | (n=2,287)    |        | (n=424)      |        | (n=185)   |        | (n=15,143) |        |
|            |                                       | n                                              | (%)    | n            | (%)    | n            | (%)    | n            | (%)    | n         | (%)    | n          | (%)    |
| Sex        | Men                                   | 960                                            | (39.1) | 6305         | (64.4) | 1949         | (85.2) | 379          | (89.4) | 174       | (94.1) | 9767       | (64.5) |
|            | Women                                 | 1494                                           | (60.9) | 3488         | (35.6) | 338          | (14.8) | 45           | (10.6) | 11        | (5.9)  | 5376       | (35.5) |
| Age        | ≤29 years                             | 407                                            | (16.6) | 1840         | (18.8) | 444          | (19.4) | 110          | (25.9) | 41        | (22.2) | 2842       | (18.8) |
|            | 30–39 years                           | 601                                            | (24.5) | 2431         | (24.8) | 634          | (27.7) | 132          | (31.1) | 53        | (28.6) | 3851       | (25.4) |
|            | 40–49 years                           | 548                                            | (22.3) | 2364         | (24.1) | 614          | (26.8) | 102          | (24.1) | 44        | (23.8) | 3672       | (24.2) |
|            | 50–59 years                           | 457                                            | (18.6) | 2115         | (21.6) | 480          | (21.0) | 70           | (16.5) | 45        | (24.3) | 3167       | (20.9) |
|            | ≥60 years                             | 441                                            | (18.0) | 1043         | (10.7) | 115          | (5.0)  | 10           | (2.4)  | 2         | (1.1)  | 1611       | (10.6) |
| Employment | Regular employee                      | 490                                            | (20.0) | 7069         | (72.2) | 2139         | (93.5) | 413          | (97.4) | 184       | (99.5) | 10295      | (68.0) |
|            | Non-regular employee"                 | 1964                                           | (80.0) | 2724         | (27.8) | 148          | (6.5)  | 11           | (2.6)  | 1         | (0.5)  | 4848       | (32.0) |
| Job type   | Managerial                            | 37                                             | (1.5)  | 1747         | (17.8) | 651          | (28.5) | 103          | (24.3) | 49        | (26.5) | 2587       | (17.1) |
|            | Professional, technical, and Clerical | 109                                            | (4.4)  | 879          | (9.0)  | 361          | (15.8) | 68           | (16.0) | 35        | (18.9) | 1452       | (9.6)  |
|            | Sales & merchandising                 | 318                                            | (13.0) | 903          | (9.2)  | 34           | (1.5)  | 0            | (0.0)  | 0         | (0.0)  | 1255       | (8.3)  |
|            | Sales & marketing                     | 75                                             | (3.1)  | 1362         | (13.9) | 218          | (9.5)  | 12           | (2.8)  | 2         | (1.1)  | 1669       | (11.0) |
|            | Service workers                       | 1223                                           | (49.8) | 2040         | (20.8) | 128          | (5.6)  | 9            | (2.1)  | 1         | (0.5)  | 3401       | (22.5) |
|            | Transportation                        | 20                                             | (0.8)  | 17           | (0.2)  | 8            | (0.3)  | 1            | (0.2)  | 0         | (0.0)  | 46         | (0.3)  |
|            | Construction                          | 20                                             | (0.8)  | 576          | (5.9)  | 433          | (18.9) | 194          | (45.8) | 88        | (47.6) | 1311       | (8.7)  |
|            | Production and technical workers      | 49                                             | (2.0)  | 119          | (1.2)  | 21           | (0.9)  | 5            | (1.2)  | 2         | (1.1)  | 196        | (1.3)  |
|            | Others                                | 267                                            | (10.9) | 574          | (5.9)  | 114          | (5.0)  | 10           | (2.4)  | 4         | (2.2)  | 969        | (6.4)  |
| Shift work | No                                    | 2087                                           | (85.0) | 9180         | (93.7) | 2234         | (97.7) | 414          | (97.6) | 183       | (98.9) | 14098      | (93.1) |
|            | Yes                                   | 367                                            | (15.0) | 613          | (6.3)  | 53           | (2.3)  | 10           | (2.4)  | 2         | (1.1)  | 1045       | (6.9)  |
| COVID-19   | No experience                         | 1629                                           | (66.4) | 6714         | (68.6) | 1308         | (57.2) | 102          | (24.1) | 36        | (19.5) | 9789       | (64.6) |
|            | Experience                            | 825                                            | (33.6) | 3079         | (31.4) | 979          | (42.8) | 322          | (75.9) | 149       | (80.5) | 5354       | (35.4) |
