# Supplementary material for: Characteristics of long working hours and subsequent psychological and physical responses: JNIOSH cohort study
Source: PubMed Central journal article supplement — Occup Environ Med. 2023 Apr 27;80(6):304–11. doi: 10.1136/oemed-2022-108672 (PMC10313994; doi:10.1136/oemed-2022-108672), 2023-04-27
Supplement: oemed-2022-108672supp002.pdf [file oemed-2022-108672supp002.pdf]

Supplemental\_Table 2 Distribution of attributes by frequency of long working hours

|                 |                                       | Frequency of long working hours (over 205 h/mo) |                   |                  |                        |                       |                           | Total<br>(n=15,143) |
|-----------------|---------------------------------------|-------------------------------------------------|-------------------|------------------|------------------------|-----------------------|---------------------------|---------------------|
|                 |                                       | Zero<br>(n=12,394)                              | Once<br>(n=1,049) | Twice<br>(n=617) | Three times<br>(n=478) | Four times<br>(n=392) | Five/Six times<br>(n=213) |                     |
| Sex             | Men                                   | 7334 (59.2)                                     | 907 (86.5)        | 557 (90.3)       | 418 (87.4)             | 361 (92.1)            | 190 (89.2)                | 9767 (64.5)         |
|                 | Women                                 | 5060 (40.8)                                     | 142 (13.5)        | 60 (9.7)         | 60 (12.6)              | 31 (7.9)              | 23 (10.8)                 | 5376 (35.5)         |
| Age             | ≤29 years                             | 2227 (18.0)                                     | 216 (20.6)        | 146 (23.7)       | 111 (23.2)             | 91 (23.2)             | 51 (23.9)                 | 2842 (18.8)         |
|                 | 30–39 years                           | 3093 (25.0)                                     | 275 (26.2)        | 162 (26.3)       | 141 (29.5)             | 113 (28.8)            | 67 (31.5)                 | 3851 (25.4)         |
|                 | 40–49 years                           | 3028 (24.4)                                     | 266 (25.4)        | 141 (22.9)       | 99 (20.7)              | 95 (24.2)             | 43 (20.2)                 | 3672 (24.2)         |
|                 | 50–59 years                           | 2578 (20.8)                                     | 228 (21.7)        | 130 (21.1)       | 103 (21.5)             | 81 (20.7)             | 47 (22.1)                 | 3167 (20.9)         |
|                 | ≥60 years                             | 1468 (11.8)                                     | 64 (6.1)          | 38 (6.2)         | 24 (5.0)               | 12 (3.1)              | 5 (2.3)                   | 1611 (10.6)         |
| Employment type | Regular employee                      | 7667 (61.9)                                     | 996 (94.9)        | 590 (95.6)       | 455 (95.2)             | 382 (97.4)            | 205 (96.2)                | 10295 (68.0)        |
|                 | Non-regular employee                  | 4727 (38.1)                                     | 53 (5.1)          | 27 (4.4)         | 23 (4.8)               | 10 (2.6)              | 8 (3.8)                   | 4848 (32.0)         |
| Job type        | Managerial                            | 1884 (15.2)                                     | 283 (27.0)        | 154 (25.0)       | 126 (26.4)             | 81 (20.7)             | 59 (27.7)                 | 2587 (17.1)         |
|                 | Professional, technical, and research | 971 (7.8)                                       | 193 (18.4)        | 103 (16.7)       | 82 (17.2)              | 70 (17.9)             | 33 (15.5)                 | 1452 (9.6)          |
|                 | clerical                              | 1966 (15.9)                                     | 140 (13.3)        | 83 (13.5)        | 44 (9.2)               | 18 (4.6)              | 6 (2.8)                   | 2257 (14.9)         |
|                 | Sales & merchandising                 | 1227 (9.9)                                      | 20 (1.9)          | 4 (0.6)          | 2 (0.4)                | 1 (0.3)               | 1 (0.5)                   | 1255 (8.3)          |
|                 | Sales & marketing                     | 1469 (11.9)                                     | 103 (9.8)         | 60 (9.7)         | 24 (5.0)               | 7 (1.8)               | 6 (2.8)                   | 1669 (11.0)         |
|                 | Service workers                       | 3316 (26.8)                                     | 52 (5.0)          | 12 (1.9)         | 10 (2.1)               | 6 (1.5)               | 5 (2.3)                   | 3401 (22.5)         |
|                 | Transportation                        | 39 (0.3)                                        | 2 (0.2)           | 2 (0.3)          | 3 (0.6)                | 0 (0.0)               | 0 (0.0)                   | 46 (0.3)            |
|                 | Construction                          | 478 (3.9)                                       | 205 (19.5)        | 177 (28.7)       | 161 (33.7)             | 194 (49.5)            | 96 (45.1)                 | 1311 (8.7)          |
|                 | Production and technical workers      | 164 (1.3)                                       | 14 (1.3)          | 5 (0.8)          | 8 (1.7)                | 3 (0.8)               | 2 (0.9)                   | 196 (1.3)           |
| Others          | 880 (7.1)                             | 37 (3.5)                                        | 17 (2.8)          | 18 (3.8)         | 12 (3.1)               | 5 (2.3)               | 969 (6.4)                 |                     |
| Shift work      | No                                    | 11394 (91.9)                                    | 1032 (98.4)       | 606 (98.2)       | 470 (98.3)             | 386 (98.5)            | 210 (98.6)                | 14098 (93.1)        |
|                 | Yes                                   | 1000 (8.1)                                      | 17 (1.6)          | 11 (1.8)         | 8 (1.7)                | 6 (1.5)               | 3 (1.4)                   | 1045 (6.9)          |
| COVID-19        | No experience                         | 8803 (71.0)                                     | 488 (46.5)        | 239 (38.7)       | 141 (29.5)             | 61 (15.6)             | 57 (26.8)                 | 9788 (64.6)         |
|                 | Experienced                           | 3591 (29.0)                                     | 561 (53.5)        | 378 (61.3)       | 337 (70.5)             | 331 (84.4)            | 156 (73.2)                | 5354 (35.4)         |
