# Supplementary material for: Characteristics of long working hours and subsequent psychological and physical responses: JNIOSH cohort study
Source: PubMed Central journal article supplement — Occup Environ Med. 2023 Apr 27;80(6):304–11. doi: 10.1136/oemed-2022-108672 (PMC10313994; doi:10.1136/oemed-2022-108672), 2023-04-27
Supplement: oemed-2022-108672supp004.pdf [file oemed-2022-108672supp004.pdf]

Supplemental\_Table 4 Relationship between frequency of long working hours and stress response scores

|                    |                    | Crude model            |             |                         |                                  |                  | Model 1 <sup>a</sup> |            |                     |           | Model 2 <sup>b</sup> |            |                     |       |
|--------------------|--------------------|------------------------|-------------|-------------------------|----------------------------------|------------------|----------------------|------------|---------------------|-----------|----------------------|------------|---------------------|-------|
|                    |                    | Mear (SE) <sup>c</sup> | p-values    | $\eta p^2$ <sup>d</sup> | Multiple comparison <sup>e</sup> | Mear (SE)        | p-values             | $\eta p^2$ | Multiple comparison | Mear (SE) | p-values             | $\eta p^2$ | Multiple comparison |       |
| Vigor              | I. Zero            | 12394                  | 2.27 (0.01) | 0.000                   | 0.005                            | ref <sup>f</sup> | 2.27 (0.01)          | 0.000      | 0.003               | ref       | 2.27 (0.01)          | 0.000      | 0.004               | ref   |
|                    | II. Once           | 1049                   | 2.19 (0.03) |                         |                                  | 0.033            | 2.21 (0.03)          |            |                     | 0.583     | 2.20 (0.03)          |            |                     | 0.116 |
|                    | III. Twice         | 617                    | 2.16 (0.03) |                         |                                  | 0.021            | 2.18 (0.03)          |            |                     | 0.191     | 2.16 (0.03)          |            |                     | 0.026 |
|                    | IV. Three times    | 478                    | 2.14 (0.04) |                         |                                  | 0.008            | 2.16 (0.04)          |            |                     | 0.082     | 2.13 (0.04)          |            |                     | 0.005 |
|                    | V. Four times      | 392                    | 2.11 (0.04) |                         |                                  | 0.003            | 2.13 (0.04)          |            |                     | 0.019     | 2.09 (0.04)          |            |                     | 0.000 |
|                    | VI. Five/six times | 213                    | 1.94 (0.06) |                         |                                  | 0.000            | 1.96 (0.06)          |            |                     | 0.000     | 1.93 (0.06)          |            |                     | 0.000 |
| Irritability       | I. Zero            | 12394                  | 2.05 (0.01) | 0.024                   | 0.001                            | ref              | 2.04 (0.01)          | 0.000      | 0.002               | ref       | 2.03 (0.01)          | 0.000      | 0.004               | ref   |
|                    | II. Once           | 1049                   | 2.02 (0.02) |                         |                                  | 1.000            | 2.08 (0.02)          |            |                     | 1.000     | 2.10 (0.02)          |            |                     | 0.063 |
|                    | III. Twice         | 617                    | 2.02 (0.03) |                         |                                  | 1.000            | 2.07 (0.03)          |            |                     | 1.000     | 2.10 (0.03)          |            |                     | 0.290 |
|                    | IV. Three times    | 478                    | 2.07 (0.04) |                         |                                  | 1.000            | 2.12 (0.04)          |            |                     | 0.290     | 2.17 (0.04)          |            |                     | 0.002 |
|                    | V. Four times      | 392                    | 2.08 (0.04) |                         |                                  | 1.000            | 2.13 (0.04)          |            |                     | 0.244     | 2.20 (0.04)          |            |                     | 0.000 |
|                    | VI. Five/six times | 213                    | 2.21 (0.05) |                         |                                  | 0.034            | 2.26 (0.05)          |            |                     | 0.000     | 2.31 (0.05)          |            |                     | 0.000 |
| Anxiety            | I. Zero            | 12394                  | 1.88 (0.01) | 0.000                   | 0.008                            | ref              | 1.88 (0.01)          | 0.000      | 0.011               | ref       | 1.88 (0.01)          | 0.000      | 0.009               | ref   |
|                    | II. Once           | 1049                   | 1.94 (0.02) |                         |                                  | 0.230            | 1.98 (0.02)          |            |                     | 0.000     | 1.98 (0.02)          |            |                     | 0.001 |
|                    | III. Twice         | 617                    | 2.01 (0.03) |                         |                                  | 0.001            | 2.04 (0.03)          |            |                     | 0.000     | 2.04 (0.03)          |            |                     | 0.000 |
|                    | IV. Three times    | 478                    | 2.09 (0.03) |                         |                                  | 0.000            | 2.12 (0.03)          |            |                     | 0.000     | 2.11 (0.03)          |            |                     | 0.000 |
|                    | V. Four times      | 392                    | 2.17 (0.04) |                         |                                  | 0.000            | 2.19 (0.04)          |            |                     | 0.000     | 2.17 (0.04)          |            |                     | 0.000 |
|                    | VI. Five/six times | 213                    | 2.17 (0.05) |                         |                                  | 0.000            | 2.20 (0.05)          |            |                     | 0.000     | 2.18 (0.05)          |            |                     | 0.000 |
| Depression         | I. Zero            | 12394                  | 1.78 (0.01) | 0.000                   | 0.002                            | ref              | 1.79 (0.01)          | 0.112      | 0.001               | ref       | 1.78 (0.01)          | 0.000      | 0.002               | ref   |
|                    | II. Once           | 1049                   | 1.82 (0.02) |                         |                                  | 1.000            | 1.79 (0.02)          |            |                     | 1.000     | 1.82 (0.02)          |            |                     | 1.000 |
|                    | III. Twice         | 617                    | 1.84 (0.03) |                         |                                  | 0.767            | 1.81 (0.03)          |            |                     | 1.000     | 1.85 (0.03)          |            |                     | 0.377 |
|                    | IV. Three times    | 478                    | 1.88 (0.03) |                         |                                  | 0.089            | 1.84 (0.03)          |            |                     | 1.000     | 1.89 (0.03)          |            |                     | 0.014 |
|                    | V. Four times      | 392                    | 1.87 (0.04) |                         |                                  | 0.303            | 1.83 (0.04)          |            |                     | 1.000     | 1.91 (0.04)          |            |                     | 0.012 |
|                    | VI. Five/six times | 213                    | 1.96 (0.05) |                         |                                  | 0.009            | 1.91 (0.05)          |            |                     | 0.242     | 1.97 (0.05)          |            |                     | 0.003 |
| Fatigue            | I. Zero            | 12394                  | 2.07 (0.01) | 0.000                   | 0.003                            | ref              | 2.05 (0.01)          | 0.000      | 0.003               | ref       | 2.04 (0.01)          | 0.000      | 0.004               | ref   |
|                    | II. Once           | 1049                   | 1.93 (0.03) |                         |                                  | 0.000            | 2.04 (0.03)          |            |                     | 1.000     | 2.06 (0.03)          |            |                     | 1.000 |
|                    | III. Twice         | 617                    | 1.95 (0.03) |                         |                                  | 0.009            | 2.06 (0.03)          |            |                     | 1.000     | 2.09 (0.03)          |            |                     | 1.000 |
|                    | IV. Three times    | 478                    | 2.05 (0.04) |                         |                                  | 1.000            | 2.15 (0.04)          |            |                     | 0.107     | 2.19 (0.04)          |            |                     | 0.001 |
|                    | V. Four times      | 392                    | 2.09 (0.04) |                         |                                  | 1.000            | 2.19 (0.04)          |            |                     | 0.015     | 2.24 (0.04)          |            |                     | 0.000 |
|                    | VI. Five/six times | 213                    | 2.25 (0.06) |                         |                                  | 0.033            | 2.34 (0.06)          |            |                     | 0.000     | 2.38 (0.06)          |            |                     | 0.000 |
| Physical complaint | I. Zero            | 12394                  | 1.76 (0.01) | 0.013                   | 0.001                            | ref              | 1.75 (0.01)          | 0.589      | 0.000               | ref       | 1.75 (0.01)          | 0.343      | 0.000               | ref   |
|                    | II. Once           | 1049                   | 1.71 (0.02) |                         |                                  | 0.104            | 1.76 (0.02)          |            |                     | 1.000     | 1.76 (0.02)          |            |                     | 1.000 |
|                    | III. Twice         | 617                    | 1.71 (0.02) |                         |                                  | 0.229            | 1.75 (0.02)          |            |                     | 1.000     | 1.76 (0.02)          |            |                     | 1.000 |
|                    | IV. Three times    | 478                    | 1.76 (0.03) |                         |                                  | 1.000            | 1.80 (0.03)          |            |                     | 1.000     | 1.81 (0.03)          |            |                     | 0.620 |
|                    | V. Four times      | 392                    | 1.71 (0.03) |                         |                                  | 1.000            | 1.76 (0.03)          |            |                     | 1.000     | 1.77 (0.03)          |            |                     | 1.000 |
|                    | VI. Five/six times | 213                    | 1.75 (0.04) |                         |                                  | 1.000            | 1.79 (0.04)          |            |                     | 1.000     | 1.80 (0.04)          |            |                     | 1.000 |

a : Model 1: adjusted for sex, age, job type, employment type (regular employee or others), and work style (shift work or no shift work)

b: Model 2: adjusted for Model 1 and experience or no experience with COVID-19 emergencies in April 2020

c: SE, standard error

d: partial eta squared

e: Bonferroni method

f: ref, reference
