# Supplementary material for: Characteristics of long working hours and subsequent psychological and physical responses: JNIOSH cohort study
Source: HighWire-hosted journal article supplement (doi:10.1136/oemed-2022-108672), 2023-04-28
Supplement: oemed-2022-108672supp005_data_supplement.pdf [file oemed-2022-108672supp005_data_supplement.pdf]

## Supplemental Material 1 – Details on BJSQ (Workers' self-reported stress responses)

[Instruction] Please answer the following questions concerning your health during the past month by circling the number that best fits your situation.

[options] 1: Almost never, 2: Sometimes, 3: Often, 4: Always often

|                     |    |                                                              |
|---------------------|----|--------------------------------------------------------------|
| Vigour              | 1  | I have been very active                                      |
|                     | 2  | I have been full of energy                                   |
|                     | 3  | I have been lively                                           |
| Irritability        | 1  | I have felt angry                                            |
|                     | 2  | I have been inwardly annoyed or aggravated                   |
|                     | 3  | I have felt irritable                                        |
| Anxiety             | 1  | I have felt tense                                            |
|                     | 2  | I have felt worried or insecure                              |
|                     | 3  | I have felt restless                                         |
| Depression          | 1  | I have been depressed                                        |
|                     | 2  | I have thought that doing anything was a hassle              |
|                     | 3  | I have been unable to concentrate                            |
|                     | 4  | I have felt gloomy                                           |
|                     | 5  | I have been unable to handle work                            |
|                     | 6  | I have felt sad                                              |
| Fatigue             | 1  | I have felt extremely tired                                  |
|                     | 2  | I have felt exhausted                                        |
|                     | 3  | I have felt weary or listless                                |
| Physical complaints | 1  | I have felt dizzy                                            |
|                     | 2  | I have experienced joint pains                               |
|                     | 3  | I have experienced headaches                                 |
|                     | 4  | I have had a stiff neck and /or shoulders                    |
|                     | 5  | I have had lower back pain                                   |
|                     | 6  | I have had eyestrain                                         |
|                     | 7  | I have experienced heart palpitations or shortness of breath |
|                     | 8  | I have experienced stomach and/or intestine problems         |
|                     | 9  | I have lost my appetite                                      |
|                     | 10 | I have experienced diarrhea and /or constipation             |
|                     | 11 | I haven't been able to sleep well                            |
